# Sdmg1 is a conserved transmembrane protein associated with germ cell sex determination and germline-soma interactions in mice

Diana Best<sup>1</sup>, Daniela A. Sahlender<sup>2</sup>, Norbert Walther<sup>3</sup>, Andrew A. Peden<sup>2</sup> and Ian R. Adams<sup>1,4,5,\*</sup>

In mammals, the supporting cell lineage in an embryonic gonad communicates the sex-determining decision to various sexually dimorphic cell types in the developing embryo, including the germ cells. However, the molecular nature of the sex-determining signals that pass from the supporting cells to the germ cells is not well understood. We have identified a conserved transmembrane protein, *Sdmg1*, owing to its male-specific expression in mouse embryonic gonads. *Sdmg1* is expressed in the Sertoli cells of embryonic testes from 12.5 dpc, and in granulosa cells of growing follicles in adult ovaries. In Sertoli cells, *Sdmg1* is localised to endosomes, and knock-down of *Sdmg1* in Sertoli cell lines causes mis-localisation of the secretory SNARE *Stx2* and defects in membrane trafficking. Upregulation of *Sdmg1* appears to be part of a larger programme of changes to membrane trafficking pathways in embryonic Sertoli cells, and perturbing secretion in male embryonic gonads in organ culture causes male-to-female germ cell sex reversal. These data suggest that changes that occur in the cell biology of embryonic Sertoli cells may facilitate the communication of male sex-determining decisions to the germ cells during embryonic development.

**KEY WORDS:** Mouse, Primordial germ cells, Sertoli cell, Membrane trafficking, *Sdmg1* (Tmem184a)

## INTRODUCTION

In mice, the decision of the embryo to develop as male or female depends on its sex chromosome constitution: XY embryos become male, and XX embryos become female. This decision is triggered by the presence or absence of the dominant male-determining *Sry* gene located on the Y chromosome (Koopman et al., 1991; Lovell-Badge and Robertson, 1990). *Sry* is expressed in the supporting cells of the developing gonad, a sexually dimorphic cell lineage that can differentiate into Sertoli cells in the testis or granulosa cells in the ovary (Albrecht and Eicher, 2001; Wilhelm et al., 2005). *Sry* expression in the supporting cells induces their differentiation into male Sertoli cells, which then induce other cell types in the gonad to develop as male (Palmer and Burgoyne, 1991). This results in the gonad differentiating into a testis, which is then thought to masculinise the rest of the embryo (Jost, 1947). As the direct action of *Sry* is restricted to the supporting cell lineage during embryogenesis (Palmer and Burgoyne, 1991), the nascent Sertoli cells must communicate their male sex-determining decision to various additional cell types in the developing embryo (Ross and Capel, 2005).

One of the cell lineages with which the nascent Sertoli cells must communicate is the germline. In male mouse embryos, germ cells respond to the male gonadal environment around 12.5 days post coitum (dpc), committing them to differentiate along the male spermatogenic pathway, and inhibiting oogenesis and the initiation of meiosis (Adams and McLaren, 2002; McLaren and Southee, 1997). However, the molecular nature of the germ cell sex-

determining signals is not currently understood. Sexually dimorphic development of the germ cells could be brought about by a meiosis-inducing substance in the embryonic ovary, a meiosis-preventing substance in the embryonic testis, or both (McLaren, 1984). Studies demonstrating that germ cells can initiate meiosis in a variety of ectopic locations and culture conditions (Chuma and Nakatsuji, 2001; Farini et al., 2005; McLaren and Southee, 1997; Zamboni and Upadhyay, 1983) suggest that should a meiosis-inducing substance exist, its expression cannot be restricted to the embryonic ovary. By contrast, little is known about whether a male meiosis-preventing substance exists, or what its molecular identity might be.

It has recently been proposed that retinoic acid produced by the mesonephros or adrenal gland diffuses into the embryonic gonad where it acts as a meiosis-inducing substance in the embryonic ovary, but is metabolised by the Sertoli cell-derived *Cyp26b1* enzyme to prevent meiosis in the developing testis (Bowles et al., 2006; Koubova et al., 2006). However, the observation that ectopic germ cells present in the mesonephros of male embryos, which contains abundant levels of retinoic acid (Bowles et al., 2006), do not usually initiate meiosis (McLaren, 1984) is not consistent with this model. Thus, additional signalling molecules are required to account for the differences in germ cell behaviour between male and female embryos.

In this study, we characterise a novel conserved transmembrane protein that is expressed in embryonic Sertoli cells at the time of germ cell masculinisation and is required for normal membrane trafficking in Sertoli cell lines. We also describe changes that occur in the secretory pathway in embryonic Sertoli cells, and demonstrate that perturbing secretion in male embryonic gonads induces male-to-female germ cell sex reversal.

## MATERIALS AND METHODS

### Mice

Outbred MF1 or CD1 mice were naturally mated, with noon on the day the vaginal plug was termed 0.5 dpc. Embryos older than 12.5 dpc were sexed by gonad morphology, 11.5 dpc embryos were sexed by PCR for *Ube1X* and *Ube1Y* (*Uba1* and *Ube1y1* – Mouse Genome Informatics) (Chuma and Nakatsuji, 2001).

<sup>1</sup>MRC Human Genetics Unit, Western General Hospital, Crewe Road, Edinburgh EH4 2XU, UK. <sup>2</sup>Cambridge Institute for Medical Research, University of Cambridge, Cambridge CB2 2XY, UK. <sup>3</sup>School of Life Science, University of Hamburg, Hamburg D-22527, Germany. <sup>4</sup>Edinburgh Cancer Research Centre, School of Molecular and Clinical Medicine, University of Edinburgh, MRC Human Genetics Unit Building, Western General Hospital, Crewe Road, Edinburgh EH4 2XU, UK. <sup>5</sup>Gurdon Institute, University of Cambridge, Tennis Court Road, Cambridge CB2 1QN, UK.

\* Author for correspondence (e-mail: ian.adams@hgu.mrc.ac.uk)

### Molecular biology

Standard molecular biology manipulations were performed essentially as described (Sambrook and Russell, 2001). RNA was prepared using TRI Reagent (Sigma-Aldrich, Gillingham, UK), and oligo dT-primed cDNA synthesised using Superscript III (Invitrogen, Paisley, UK). Primers for *Sdmg1* were 5'-AGTGAATGACCAGCCAGGCTGCC-3' and 5'-CCCC-TACAGGTCCTCTGAGGAATC-3'. Primers for *Gapdh* were 5'-AC-CACAGTCCATGCCATCAC-3' and 5'-TCCACCACCCTGTTGCTG-TA-3'. Transmembrane helix predictions were performed using TMHMM (Krogh et al., 2001).

### In situ hybridisation

Digoxigenin-labelled RNA probes were generated against nucleotides 26-531 of *Sdmg1* by in vitro transcription (Roche Applied Science, Burgess Hill, UK). In situ hybridisation on 7 µm wax sections of Bouin's-fixed tissue was performed as described (Meehan et al., 2000).

### Immunostaining

For immunofluorescence on cultured cells, cells were grown on coverslips then fixed with 3.7% formaldehyde in PBS. For cryosections, tissue was fixed with 3.7% formaldehyde in PBS, embedded in OCT compound (VWR, Lutterworth, UK) and cryosectioned at 10 µm. After fixation, samples were blocked (PBS, 1-10% serum, 0.1% Tween-20) and incubated with primary then secondary antibodies diluted in blocking solution. Images were acquired on a MRC1024 Confocal Microscope (Bio-Rad, Hercules, California, USA), or Axioplan II fluorescence microscope (Carl Zeiss, Welwyn Garden City, UK) equipped with a Coolsnap digital camera (Photometrics, Tucson, Arizona, USA). Pre-implantation embryos were fixed with 3.7% formaldehyde in PBS and processed as whole mounts (Arney et al., 2002).

For immunohistochemistry on 7 µm wax sections, tissue was fixed with Bouin's solution (Sigma-Aldrich) at room temperature or with 4% paraformaldehyde in PBS at 4°C. Antigen retrieval was performed by boiling for 20 minutes in 0.1 M citrate buffer (pH 6) in a microwave oven. Sections were then blocked, incubated with primary antibodies, and bound antibodies visualised using an Envision HRP-linked detection kit (Dako, Ely, UK) followed by counterstaining with Haematoxylin.

### Antibodies

Amino acids 352-449 of *Sdmg1* were fused to a glutathione-S-transferase (GST) affinity tag (GE Healthcare, Little Chalfont, UK) and the fusion protein expressed in *E. coli*, purified, and used to raise antibodies in rabbits (Abcam, Cambridge, UK). Serum was cross-adsorbed to GST coupled to Affigel (Bio-Rad), then anti-*Sdmg1* antibodies were affinity purified using Affigel-GST-*Sdmg1* (352-449), and eluted with 0.1 M glycine (pH 2.1). Sources and dilutions of primary antibodies are listed

in Table 1. Secondary antibodies were used as directed by the suppliers (Invitrogen). DNA was stained with 2 µM TOTO-3 (Invitrogen) or 2 µg/ml DAPI.

### Topology of *Sdmg1*

The *Sdmg1* open reading frame was cloned into pEYFP-N1 (Clontech) to fuse YFP to the C terminus of *Sdmg1* via a GAGADPPVAT polypeptide linker, and a haemagglutinin (HA) epitope (amino acids MVYPYDVPDYAEF) was then fused to the N terminus. NIH3T3 cells were transiently transfected with pHA-*Sdmg1*-YFP using Lipofectamine 2000 (Invitrogen). Immunofluorescence on non-permeabilised cells was performed by incubating coverslips with PBS containing 10% goat serum and primary antibodies at 4°C for 1 hour, followed by fixation, blocking and secondary antibody incubation as described above.

### Electron microscopy and immuno-electron microscopy

For electron microscopy (EM), 13.5 dpc embryonic gonads were fixed with 2% paraformaldehyde and 2.5% glutaraldehyde in 0.1 M cacodylate buffer (pH 7.2) at 4°C, post-fixed in 1% osmium tetroxide, stained with 0.5% uranyl acetate and embedded in Araldite CY212 resin. Ultrathin (70 nm) sections were post-stained with uranyl acetate and lead citrate.

For immunoEM, 13.5 dpc embryonic gonads or differentiating SK11 Sertoli cells were fixed with 4% paraformaldehyde in 0.1 M phosphate buffer (pH 7.2), embedded in 10% gelatin and infused with 1.7 M sucrose/15% polyvinyl pyrrolidone. Ultrathin (80 nm) frozen sections were collected with 1% methylcellulose in 1.65 M sucrose and labelled with 10 µg/ml anti-*Sdmg1* antibodies, followed by 10 nm gold-protein A (Slot and Geuze, 1983).

### Generation of knock-down cell lines

Complementary oligonucleotides to generate shRNA against nucleotides 1368-1388 of *Sdmg1* or against GFP (nucleotides 1321-1341 of pEGFP-N1, accession number U55762) were cloned into pSilencer-1.0-U6 (Ambion). A neomycin expression cassette (Zheng et al., 1999) was inserted into the pSilencer-shRNA constructs. Complementary oligonucleotides to generate miRNA against nucleotides 428-448 of *Sdmg1* were cloned into pcDNA6.2-GW/EmGFP-miR (Invitrogen). The resulting plasmids, along with the pcDNA6.2-GW/EmGFP-miR negative control plasmid (Invitrogen), were linearised and transfected into SK11 Sertoli cells using Lipofectamine 2000. Stably transfected cells were selected with blasticidin or Geneticin (Invitrogen), and independent clones isolated by limiting dilution.

### Urogenital ridge cultures and aggregations

Urogenital ridges were cultured on agar blocks as described previously (McLaren and Southee, 1997). Brefeldin A (Sigma-Aldrich) was used at 1 µg/ml; retinoic acid (Sigma Aldrich) at 0.7 µM; ketoconazole (Sigma-

**Table 1. Sources and concentrations of primary antibodies**

| Antibody                          | Source                               | Concentration for immunostaining |
|-----------------------------------|--------------------------------------|----------------------------------|
| Mouse anti-Amh                    | Abcam                                | 1:40                             |
| Mouse anti-GFP/YFP                | Roche Applied Sciences               | 1 µg/ml                          |
| Mouse anti-Syp3                   | Abcam                                | 1:1000                           |
| Mouse anti-Tfrc                   | Invitrogen                           | 1 µg/ml                          |
| Mouse anti-Vti1b                  | Becton Dickinson                     | 1:50                             |
| Oregon Green-phalloidin           | Invitrogen                           | 0.15 µM                          |
| Rabbit anti-HA                    | Sigma-Aldrich                        | 10 µg/ml                         |
| Rabbit anti-Mvh                   | Abcam                                | 0.1 µg/ml                        |
| Rabbit anti- <i>Sdmg1</i>         | This study                           | 1 µg/ml                          |
| Rabbit anti-Stx2                  | Calbiochem                           | 1 µg/ml                          |
| Rabbit anti-Stx3                  | Calbiochem                           | 1:100                            |
| Rabbit anti-Stx7                  | Borner et al., 2006                  | 1:400                            |
| Mouse anti-Stx16                  | Borner et al., 2006                  | 1:300                            |
| Rabbit anti-Vamp3                 | Borner et al., 2006                  | 1:100                            |
| Rabbit anti-Vamp4                 | Steegmaier et al., 1999              | 1:500                            |
| Rabbit anti-Vamp7                 | Borner et al., 2006                  | 1:50                             |
| Rabbit anti-Vamp8                 | Borner et al., 2006                  | 1:200                            |
| Rabbit IgG (non-specific control) | Sigma-Aldrich                        | 1 µg/ml                          |
| Rat anti-GCNA                     | Enders and May, 1994                 | 1:10                             |
| Rat anti-Lamp1                    | Developmental Studies Hybridoma Bank | 1 µg/ml                          |

Aldrich) at 0.7  $\mu\text{M}$  or 40  $\mu\text{M}$ ; and control cultures used equivalent volumes of solvent. Urogenital ridges were cultured for 4 or 6 days then fixed with Bouin's solution and analysed by Haematoxylin and Eosin staining of wax sections, or by immunohistochemistry for Amh, or Mvh and Sycp3 on wax sections.

For aggregations, 11.5 dpc female urogenital ridges and SK11 cell lines were trypsinised to single cell suspensions. Urogenital ridge cells ( $4 \times 10^5$ ) were mixed with  $1 \times 10^5$  SK11 cells, then aggregated and cultured on agar blocks as described (McLaren and Southee, 1997). Aggregates were cultured for 4 days then fixed in Bouin's solution and analysed by histology.

## RESULTS

### Identification and cloning of *Sdmg1*

In order to investigate the molecular basis of germ cell sex determination, we sought to identify genes that are differentially expressed between male and female gonads during germ cell sex determination (Adams and McLaren, 2002). During a molecular screen for sex-specific genes expressed by germ cells at 12.5 dpc, we identified a 241 bp male-specific cDNA fragment by representational difference analysis (Adams and McLaren, 2002) that we named *Sdmg1* (sexually dimorphic, expressed in male gonads 1; *Tmem184a* – Mouse Genome Informatics). In silico analysis of ESTs extended this fragment into a 1453 bp putative full-length clone containing a 1350 bp open reading frame encoding a 49 kDa protein (see Fig. S1 in the supplementary material). The integrity and male-specific expression of *Sdmg1* was confirmed by RT-PCR on 13.5 dpc male gonads (Fig. 1A), and sequencing of the RT-PCR product.

*Sdmg1* is a member of a family of largely uncharacterised proteins possessing a DUF300 (Domain of Unknown Function 300) protein domain that has been conserved throughout eukaryotic evolution (see Fig. S2 in the supplementary material). A single DUF300 family member is present in yeast and nematode genomes, whereas vertebrates each have three DUF300-containing proteins: *Tmem34*, *C22orf5* and *Sdmg1* (see Fig. S2 in the supplementary material). *Sdmg1* is predicted to have seven transmembrane domains (Fig. 1B), a cytosolic C terminus and a luminal/extracellular N terminus. We confirmed the topology of *Sdmg1* by assaying the accessibility of antibodies to N-terminal and C-terminal epitope tags in transiently transfected NIH3T3 cells (Fig. 1C). *Sdmg1* does not possess an N-terminal signal peptide, but has a potential C-terminal dileucine targeting motif (439-EKRMLI-444) implicated in endosome/lysosome targeting (Bonifacino and Traub,

2003). Thus, *Sdmg1* is an evolutionally conserved transmembrane protein that has a sexually dimorphic expression pattern during embryonic gonad development.

### Expression profile of *Sdmg1*

We confirmed that *Sdmg1* is expressed in a sexually dimorphic manner during the period of germ cell sex determination by immunostaining (Fig. 2A) and whole-mount in situ hybridisation (see Fig. S3 in the supplementary material) on embryonic gonads. Although we could not detect *Sdmg1* expression in male or female gonads at 11.5 dpc, *Sdmg1* mRNA and protein are both present in the testis cords of male gonads at 12.5 and 13.5 dpc, and were not detected in female gonads at these stages (Fig. 2A; see Fig. S3 in the supplementary material). Within the embryonic testis cords, *Sdmg1* protein is present in punctate structures in the cytoplasm of Sertoli cells, and is not present in germ cells (Fig. 2B). In situ hybridisation on testes from *W<sup>e</sup>/W<sup>e</sup>* mutant embryos that lack germ cells (Lyon et al., 1996) also suggests that Sertoli cells express *Sdmg1* (see Fig. S3 in the supplementary material).

We continued to characterise *Sdmg1* expression during gonad development in embryos and adults. *Sdmg1* is expressed in Sertoli cells throughout late embryogenesis and early postnatal development (Fig. 3A). In adult testes, *Sdmg1* mRNA and protein is present in the Sertoli cells (Fig. 3B,C), with the protein localised in the apical cytoplasm (Fig. 3C). *Sdmg1* is not present in female gonads during embryogenesis but its expression is upregulated in granulosa cells, the female counterpart of Sertoli cells, in growing follicles a few days after birth (Fig. 3A). In the adult ovary, *Sdmg1* mRNA and protein is expressed in granulosa cells in growing follicles (Fig. 3D,E). The upregulation of *Sdmg1* expression in granulosa cells a few days after birth is coincident with the onset of folliculogenesis and is when granulosa cells first start to influence oocyte growth and differentiation (McLaren, 2000). Thus, *Sdmg1* is expressed in both Sertoli cells and granulosa cells at the stage when each of these supporting cells starts to communicate with germ cells and regulate germ cell differentiation.

Although we did not detect any *Sdmg1* protein in male germ cells (Fig. 2B, Fig. 3C), some *Sdmg1* is present in discrete punctate cytoplasmic structures in female germ cells in growing follicles in adult ovaries (Fig. 3E, arrows). *Sdmg1* is also present in punctate cytoplasmic structures in germinal vesicle stage oocytes, and in pre-implantation embryos (Fig. 3F). The punctate anti-*Sdmg1* staining is localised to the cortical region of two-cell stage

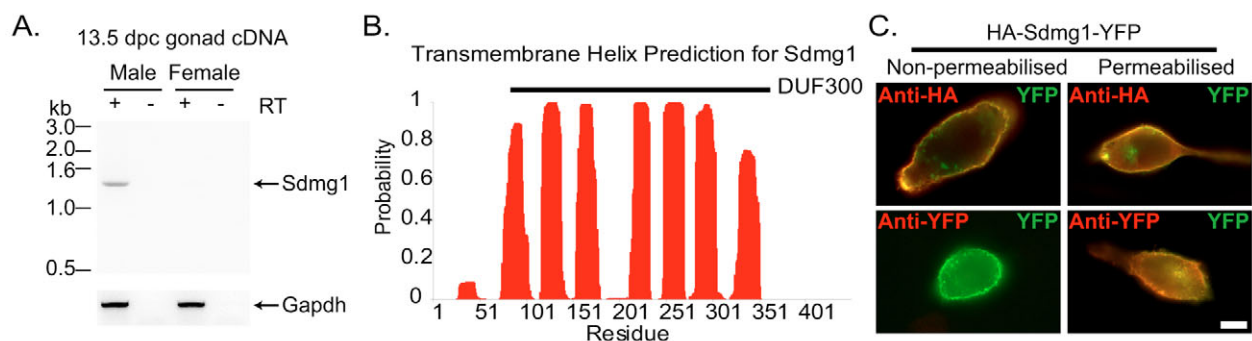

**Fig. 1. *Sdmg1* is a transmembrane protein expressed in male embryonic gonads.** (A) RT-PCR showing male-specific expression of *Sdmg1* in 13.5 dpc gonads. RT-PCR for *Gapdh* and RT-PCR without reverse transcriptase (RT) are shown as controls. (B) Transmembrane helix prediction for *Sdmg1*. The DUF300 domain is indicated with a black bar. (C) Topology of *Sdmg1*. NIH3T3 cells were transiently transfected with HA-*Sdmg1*-YFP (green) and immunostained with anti-HA or anti-YFP antibodies (red). Antibody accessibility indicates that the N-terminal HA epitope is extracellular and the C-terminal YFP epitope is intracellular. Scale bar: 10  $\mu\text{m}$ .

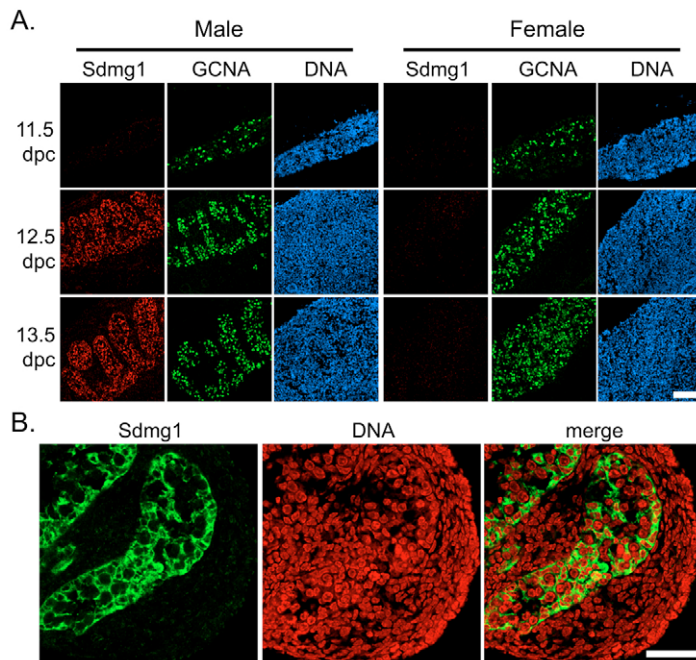

**Fig. 2. Expression of *Sdmg1* during embryonic gonad development.**

(A) Immunostaining for *Sdmg1* (red) showing male-specific expression in the gonads from 12.5 dpc. Germ cells are labelled with anti-GCNA antibody (green), DNA is shown in blue. Scale bar: 100  $\mu$ m. (B) Immunostaining in 13.5 dpc testes showing punctate staining for *Sdmg1* (green) in Sertoli cell cytoplasm. DNA is shown in red. Scale bar: 50  $\mu$ m.

embryos, and is not present in blastocysts (Fig. 3F). This may represent a maternal contribution of *Sdmg1* protein to pre-implantation embryos.

### ***Sdmg1* is associated with endosomes in the SK11 Sertoli cell line**

In adult mice, *Sdmg1* does not have a widespread expression profile: multiple tissue northern and western blotting showed that *Sdmg1* expression was restricted to testes (see Fig. S4A,B in the supplementary material) and that *Sdmg1* is N-glycosylated (see Fig. S4C in the supplementary material). *Sdmg1* is also expressed in secretory exocrine tissues such as the pancreas, salivary gland and mammary gland (D.B. and I.R.A., unpublished), suggesting that *Sdmg1* may play a role in membrane trafficking. To investigate whether *Sdmg1* functions in membrane trafficking in Sertoli cells, we used the SK11 Sertoli cell line derived from 10 days post partum (dpp) mice carrying a temperature-sensitive SV40 T antigen (Walther et al., 1996). SK11 Sertoli cells are maintained in an undifferentiated proliferating state at 33°C, but differentiate to form large, flattened cells at 39.5°C (Walther et al., 1996). Immunostaining revealed that *Sdmg1* is localised to the perinuclear region in undifferentiated SK11 cells (Fig. 4A). In differentiating SK11 cells, peripheral clusters of punctate *Sdmg1* staining are often present in addition to the perinuclear staining (Fig. 4B). These peripheral clusters of *Sdmg1* staining varied in number and size, but were always present in actin-poor regions of the cell (Fig. 4C).

*Sdmg1* contains a potential endosomal targeting sequence (see Fig. S1 in the supplementary material). We investigated whether the perinuclear and peripheral clusters of *Sdmg1* staining might represent different classes of endosome (Perret et al., 2005) by immunostaining for SNAREs [soluble N-ethylmaleimide-sensitive factor attachment protein receptors (Chen and Scheller, 2001; Jahn and Scheller, 2006)] and other membrane trafficking markers. SNAREs marking the trans-Golgi network (Vamp4, Stx16) and some endosomal SNAREs and markers (Vti1B, Stx7, Vamp7, EEA1) were mainly perinuclear in differentiated SK11 cells, and were not present in peripheral *Sdmg1*-like clusters (Fig. 4D-H; D.B. and I.R.A., unpublished). Other endosomal SNAREs and markers

(Tfrc, Vamp3, Vamp8) were present in peripheral *Sdmg1*-like clusters in differentiated SK11 cells (Fig. 4I-K). Vesicle associated membrane protein (Vamp) 3 and Vamp8 are both components of pancreatic secretory granules (Gaisano et al., 1996b; Wang et al., 2004), and although the basolateral recycling endosome marker Tfrc (transferrin receptor) partially colocalises with peripheral *Sdmg1* clusters, the peripheral *Sdmg1* puncta appeared to be distinct from the peripheral Tfrc puncta (Fig. 4I, inset). Stx3, which is present in pancreatic secretory granules, and on the plasma membrane in other cell types (Band and Kuismanen, 2005; Gaisano et al., 1996a), was also localised to peripheral *Sdmg1*-like punctate clusters in differentiating SK11 cells (Fig. 4L). Although a number of secretory granule SNAREs localise to peripheral punctate clusters in differentiating SK11 cells, we have been unable to detect any secretory granules in these cells by EM (D.A.S. and I.R.A., unpublished). However, endosomes are present in both perinuclear and peripheral regions of differentiating SK11 cells (D.A.S. and I.R.A., unpublished).

To investigate the subcellular localisation of *Sdmg1* at the ultrastructural level, we performed immunoEM on differentiating SK11 cells. By immunoEM, *Sdmg1* was localised to the limiting membrane of endosomes at various maturation stages (Fig. 4M,N). *Sdmg1* was found on electron-lucent structures that are likely to be early endosomes (Fig. 4M) and on multivesicular bodies (Fig. 4N). *Sdmg1* was also associated with tubulo-vesicular membranes (Fig. 4M). The localisation of the C-terminal anti-*Sdmg1* antibodies to the cytosolic face of membranes by immunoEM is consistent with the *Sdmg1* topology determined earlier. ImmunoEM for *Sdmg1* on 13.5 dpc embryonic testes confirmed that *Sdmg1* also localises to endosomes, multivesicular bodies and tubulo-vesicular membranes in embryonic Sertoli cells (Fig. 4O,P). *Sdmg1* was often localised to an electron-dense stretch of the cytosolic surface of endosomal membrane (Fig. 4N-P, arrowheads). Clathrin and Stx7 have both been localised to this region of endosomal membranes, which may be where sorting occurs (Prekeris et al., 1999; Sachse et al., 2002).

Thus, *Sdmg1* appears to be associated with two distinct endosomal populations in differentiating SK11 Sertoli cells: perinuclear endosomes that contain the endosomal markers Vamp7,

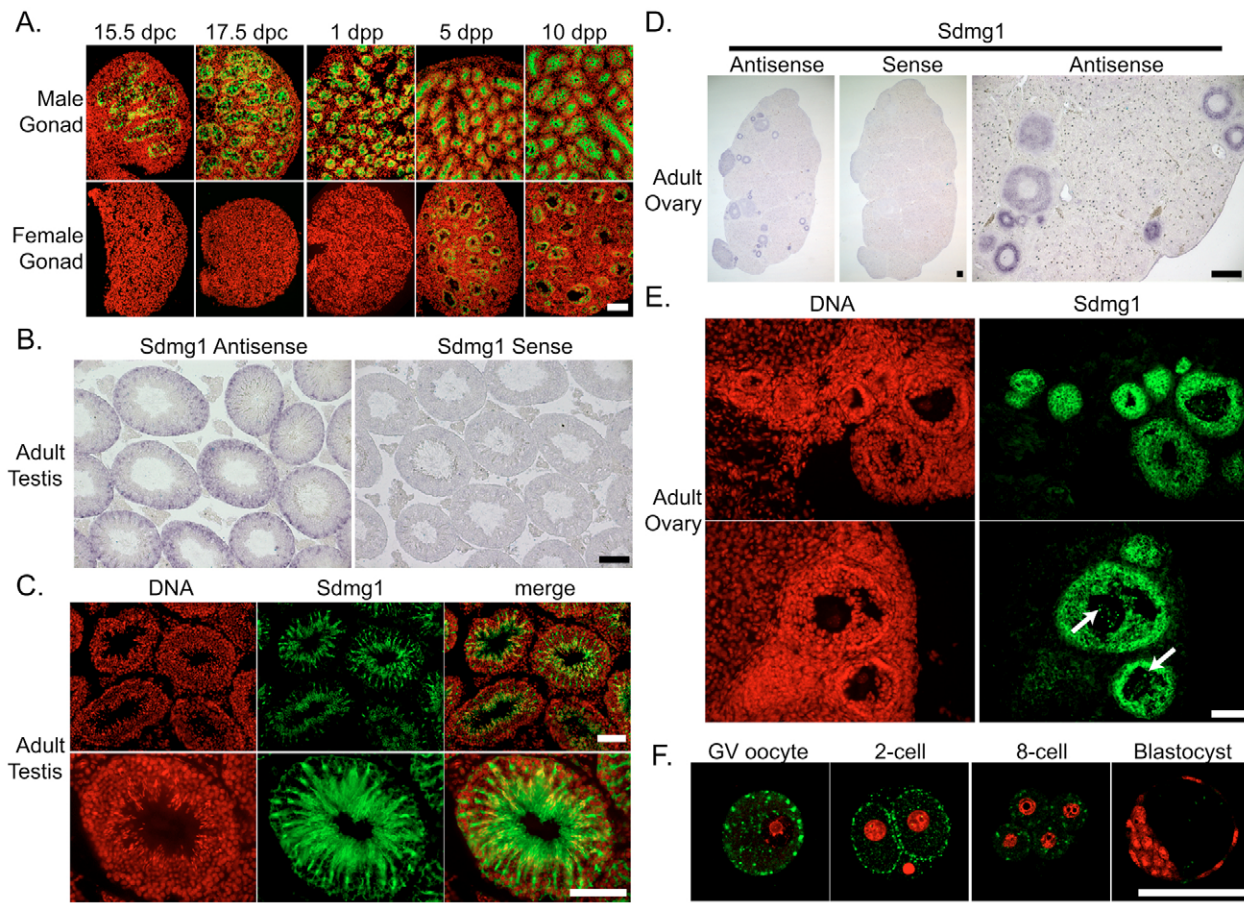

**Fig. 3. Expression of *Sdmg1* during gametogenesis.** (A) *Sdmg1* is expressed in the testis cords from 15.5 dpc to 10 dpp, and in ovarian follicles from 5 dpp. *Sdmg1* immunostaining is shown in green, DNA in red. (B) In situ hybridisation showing *Sdmg1* mRNA expression in Sertoli cells in adult testis (antisense probe, purple precipitate). (C) Immunostaining of adult testis cryosections showing *Sdmg1* (green) in Sertoli cell cytoplasm. (D) In situ hybridisation showing *Sdmg1* mRNA expression in granulosa cells in follicles in adult ovaries. (E) Immunostaining of adult ovary cryosections showing *Sdmg1* (green) in the granulosa cells of follicles. Some *Sdmg1* is also present in the oocyte cytoplasm (arrows). (F) Immunostaining for *Sdmg1* (green) in germinal vesicle (GV) stage oocytes and pre-implantation embryos. Scale bars 100  $\mu$ m.

Stx7 and EEA1; and peripheral endosomes containing Vamp8, Vamp3 and Stx3 SNAREs that localise to secretory granules in pancreatic acinar cells. In polarised cell types that lack secretory granules, Vamp8 localises to apical endosomes (Steggmaier et al., 2000). One interpretation of these data is that the peripheral endosomes in differentiating SK11 Sertoli cells are apical endosomes, and the perinuclear endosomes are common to both apical and basolateral pathways.

### Knock-down of *Sdmg1* impairs membrane trafficking in SK11 Sertoli cell lines

In order to investigate whether *Sdmg1* is required for membrane trafficking, we generated stable *Sdmg1* knock-down SK11 Sertoli cell lines. The *Sdmg1* knock-down lines are viable but grow at a slower rate than the wild-type cells (D.B. and I.R.A., unpublished). Immunostaining confirmed that the SK11 cell lines carrying anti-*Sdmg1* shRNAs or miRNAs have reduced levels of *Sdmg1* protein (Fig. 5A-F).

We assayed membrane trafficking in the differentiated *Sdmg1* knock-down SK11 cell lines by immunofluorescence for various SNAREs. Vamp4, Vamp8 and Stx3 showed no obvious change in their subcellular localisation in differentiated *Sdmg1* knock-down SK11 cells (D.B. and I.R.A., unpublished). However, the plasma

membrane SNARE Stx2 (syntaxin 2), which is an apical plasma membrane SNARE for secretory granule fusion in pancreatic acinar cells (Hansen et al., 1999), was mis-localised in *Sdmg1* knock-down cells. In the parental SK11 Sertoli cell line and in the shRNA/miRNA negative control cell lines, Stx2 is distributed between the plasma membrane and perinuclear region, but in *Sdmg1* knock-down cell lines Stx2 accumulates in intracellular structures (Fig. 5G-L). Thus, *Sdmg1* is required for the normal subcellular distribution of Stx2.

As *Sdmg1* is required to localise the secretory SNARE Stx2, we next investigated whether *Sdmg1* plays a role in secretion. Although *Sdmg1* is localised to endosomes, secretion through endosomal intermediates is a major secretory route in some polarised cell types (Ang et al., 2004; Lock and Stow, 2005). However, as we do not know the identity of any secretory cargo trafficking through *Sdmg1*-positive endosomes, we set up a bioassay for SK11 Sertoli cell secretion by aggregating SK11 cells with 11.5 dpc female urogenital ridge tissue and assayed whether the SK11 cells could masculinise female germ cells. As expected, most germ cells from the re-aggregated female urogenital ridge tissue cultured without SK11 cells differentiated into meiotic oocytes (Fig. 5M, 95% of germ cells develop as female,  $n=109$ ), consistent with previous experiments (Adams and McLaren,

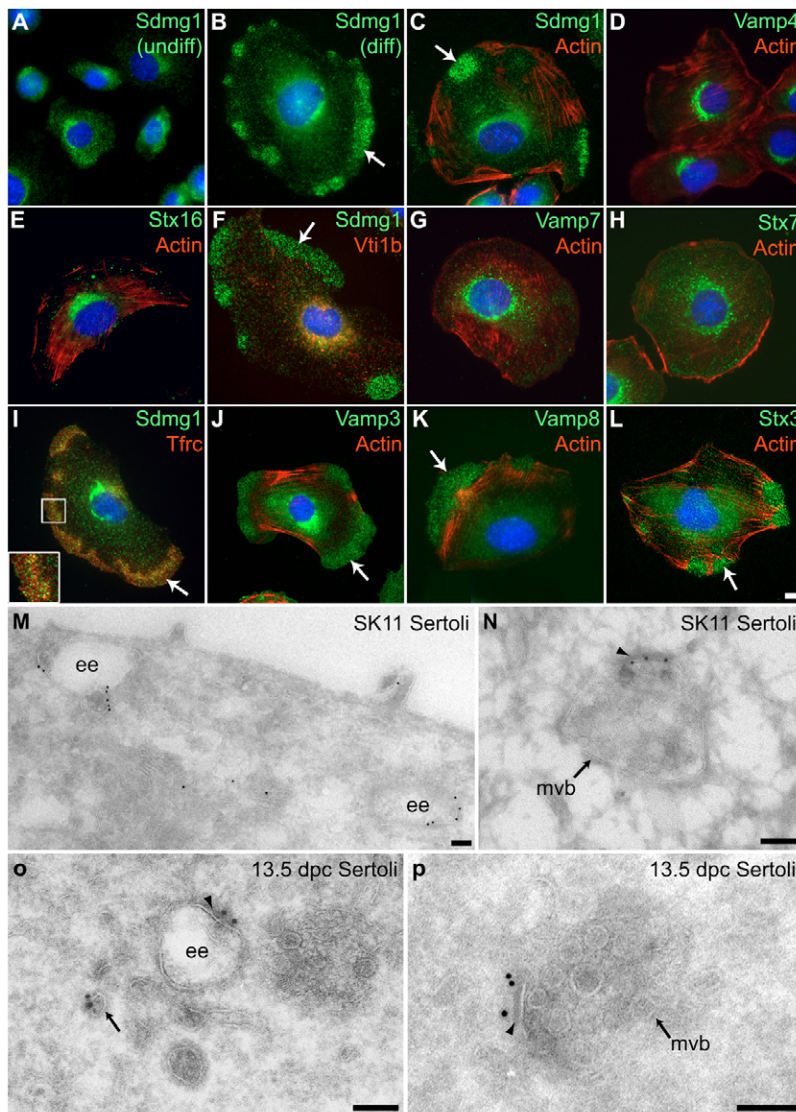

**Fig. 4. Sdmg1 is localised to endosomes in Sertoli cells.** (A) Immunostaining shows Sdmg1 is perinuclear in undifferentiated (undiff) SK11 Sertoli cells grown at 33°C. (B) Sdmg1 is present in perinuclear and peripheral clusters (arrow) in differentiating (diff) SK11 Sertoli cells grown at 39.5°C for 1 day. (C) The peripheral clusters (arrows) of Sdmg1 staining are localised to actin-poor parts of the cell. (D-H) Trans-Golgi network markers Vamp4 and Stx16, and endosomal markers Vti1b, Vamp7 and Stx7 all have a perinuclear distribution in differentiating SK11 Sertoli cells. (I-L) The recycling endosome marker Tfr3, and the Vamp3, Vamp8 and Stx3 SNAREs associated with secretory granules all exhibit peripheral clusters of punctate staining (arrows) in differentiating SK11 Sertoli cells. DNA is shown in blue. Scale bar: 10  $\mu$ m. (M-P) ImmunoEM for Sdmg1 (10 nm gold particles) in differentiating SK11 Sertoli cells (M,N) and 13.5 dpc Sertoli cells (O,P). Sdmg1 is localised to the limiting membrane of early endosomes (ee) and multivesicular bodies (mvb), and is often associated with an electron-dense region of the limiting membrane (arrowhead). Sdmg1 is also present on tubulo-vesicular membranes (M, arrow in P). Scale bars: 100 nm.

2002). However, when SK11 Sertoli cells were aggregated with this tissue, few meiotic oocytes were found in the aggregates, and male prospermatogonia were present (Fig. 5N, 75% of germ cells develop as male,  $n=102$ ). The ability of SK11 Sertoli cells to influence female germ cell development appears to depend on *Sdmg1* as knock-down of *Sdmg1* impaired the ability of SK11 Sertoli cells to influence female germ cell development (Fig. 5O, 96% of germ cells develop as female,  $n=103$ ). shRNA negative control SK11 Sertoli cells behaved in a similar manner to the parental SK11 Sertoli cells in this aggregate system (D.B. and I.R.A., unpublished).

The effect that SK11 Sertoli cells have on female germ cell development could be due to SK11 Sertoli cells directly or indirectly masculinising developing germ cells or causing the degeneration of female meiotic germ cells. The relatively low number of surviving germ cells in the aggregates containing SK11 Sertoli cells (D.B. and I.R.A., unpublished) indicates that degeneration of female meiotic oocytes probably contributes to this effect. The observation that knock-down of *Sdmg1* impairs the ability of SK11 Sertoli cells to masculinise germ cells is consistent with knock-down of *Sdmg1* perturbing membrane trafficking, and presumably secretion of signalling molecules.

### Embryonic Sertoli cells are specialised secretory cells

As *Sdmg1* is expressed in embryonic Sertoli cells, and is associated with secretory granules in secretory exocrine tissues (D.B. and I.R.A., unpublished), we sought to determine whether embryonic Sertoli cells contain secretory granules. Secretory granules have previously been reported in embryonic rat Sertoli cells (Hatier and Grignon, 1980). We observed secretory granules in mouse embryonic Sertoli cells in 13.5 dpc testes by EM (Fig. 6A-C). We also found large prominent secretory granules in male germ cells at this stage (Fig. 6D,E). Germ cells in 13.5 dpc ovaries contained similar secretory granules to those seen in male germ cells at 13.5 dpc (D.A.S. and I.R.A., unpublished). We were unable to determine whether supporting cells in 13.5 dpc ovaries contained secretory granules, as these cells do not have a readily recognisable morphology at this stage.

To reinforce our finding that embryonic Sertoli cells contain secretory granules, we investigated whether components of the regulated secretory pathway are upregulated in male embryonic gonads (Fig. 6F-J). Vamp4, a trans-Golgi network SNARE that is not associated with secretory granules was used as a control. Vamp4 is ubiquitously expressed throughout 13.5 dpc male and female

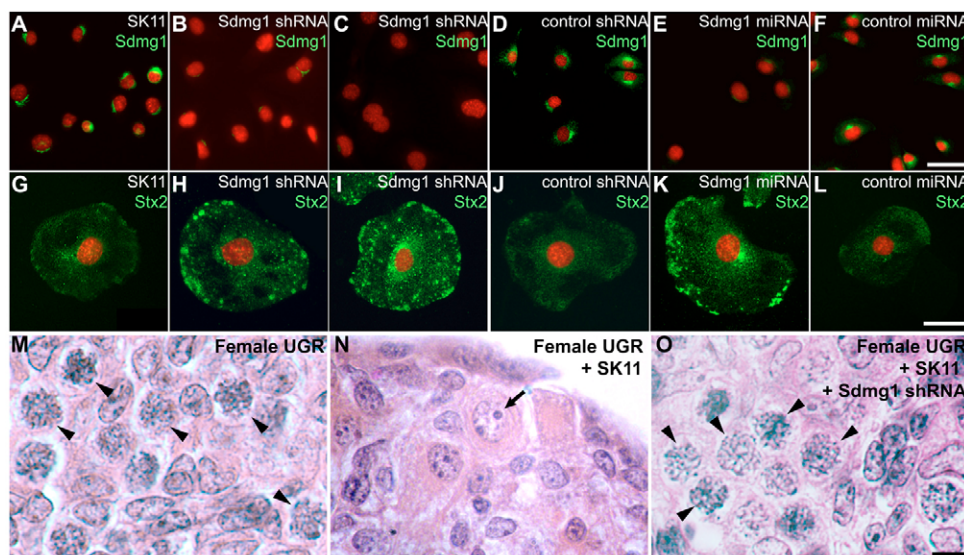

**Fig. 5. *Sdmg1* is required for membrane trafficking and secretion in SK11 Sertoli cells.** (A-F) Immunostaining of undifferentiated SK11 Sertoli cell lines shows that lines stably transfected with *Sdmg1* knock-down constructs (*Sdmg1* shRNA and *Sdmg1* miRNA) have reduced levels of *Sdmg1* protein. (G-L) Immunostaining of SK11 Sertoli cells after 2 days of differentiation shows that *Stx2* accumulates intracellularly in lines stably transfected with *Sdmg1* knock-down constructs. DNA is shown in red. Scale bars: 50  $\mu$ m. (M-O) Histology of 11.5 dpc female urogenital ridge tissue cultured after aggregation with or without SK11 Sertoli cell lines. Most germ cells develop into female meiotic oocytes after aggregation without SK11 cells (M, arrowheads), into male prospermatogonia (N, arrow) after aggregation with SK11 cells, and into female meiotic oocytes after aggregation with *Sdmg1* knock-down SK11 cells (O, arrowheads). Scale bar: 10  $\mu$ m.

gonads (Fig. 6F), whereas the secretory granule SNARE Vamp3 is highly expressed in embryonic testis cords, and in cells distributed throughout the embryonic ovary (Fig. 6G). The Vamp3 staining pattern resembles germ cells, and may reflect the prominent secretory granules that we observed in this cell type. Interestingly, the secretory granule SNARE Vamp8 is upregulated in the testis cords of 13.5 dpc male gonads compared with females (Fig. 6H), and *Stx2*, an apical plasma membrane SNARE involved in secretory granule fusion in the pancreas, is also upregulated in the 13.5 dpc testis cords (Fig. 6I). Both Vamp8 and *Stx2* are present in the Sertoli cell cytoplasm (D.B. and I.R.A., unpublished). Thus, embryonic Sertoli cells possess secretory granules and upregulate components of the regulated secretory pathway, suggesting that embryonic Sertoli cells are a secretory cell type.

### Perturbation of secretion in male embryonic gonads causes germline sex reversal

The differences that we have described in the membrane trafficking pathway between male and female supporting cells in embryonic gonads may reflect a requirement for the embryonic Sertoli cells to secrete masculinising factors to various cell types during testis development, including the germ cells. Therefore, we tested whether membrane trafficking is important for germ cell sex determination by culturing urogenital ridges with brefeldin A. Brefeldin A blocks recruitment of coat proteins onto intracellular membranes, and is a potent inhibitor of secretion and post-Golgi trafficking (Klausner et al., 1992). Although prolonged treatment of mouse embryonic gonads with brefeldin A for longer than 24 hours resulted in toxicity, shorter exposure times of around 6 hours did not appear to be toxic to the developing tissue (D.B. and I.R.A., unpublished), or to mouse pre-implantation embryos (Ogawa et al., 1997).

Germ cells in 11.5 dpc female urogenital ridges treated with brefeldin A differentiated into meiotic oocytes in a manner comparable with control female urogenital ridges (Fig. 7A-F).

Meiotic oocytes were detected by their distinctive histological appearance (Fig. 7A,D, arrowheads), and confirmed by immunostaining for the synaptonemal complex protein *Sycp3* (Fig. 7C,F, arrowheads). As *Sycp3* RNA and protein can be detected in both male and female germ cells in mid-late gestation embryos (Chuma and Nakatsuji, 2001; Di Carlo et al., 2000), assembly of this protein into thread-like synaptonemal complex structures is a more robust marker for meiosis than *Sycp3* gene expression (Novak et al., 2006). Almost all of the Mvh-positive germ cells in female urogenital ridges cultured with or without brefeldin A were in meiosis, demonstrating that transient treatment of 11.5 dpc female urogenital ridges with brefeldin A does not influence female germ cell development.

By contrast, transient treatment of 11.5 dpc male urogenital ridges with brefeldin A induced germ cell sex reversal in culture (Fig. 7G-L). In control male cultures, germ cells differentiated into prospermatogonia (Fig. 7G, arrows). These prospermatogonia express *Sycp3*, but *Sycp3* does not assemble into thread-like synaptonemal complex, and is present in nuclear aggregates (Fig. 7I, arrows), consistent with previous reports (Chuma and Nakatsuji, 2001; Di Carlo et al., 2000). However, when 11.5 dpc male urogenital ridges were transiently treated with brefeldin A for 6 hours, many of the germ cells differentiated into meiotic oocytes containing thread-like synaptonemal complex structures (Fig. 7J,L, arrowheads). Brefeldin A did not appear to cause gross defects in Sertoli cell differentiation (Fig. 7K). The meiotic oocytes tended to be present in one pole of the cultured male gonad, with the 'sex-reversed' area of the cultured gonad comprising around one-quarter of the entire gonad. These data suggest that germ cell differentiation along the male pathway requires secretion in the developing testis.

One possible interpretation of our data is that brefeldin A interferes with Cyp26b1-mediated metabolism of retinoic acid (Bowles et al., 2006; Koubova et al., 2006). We tested this possibility

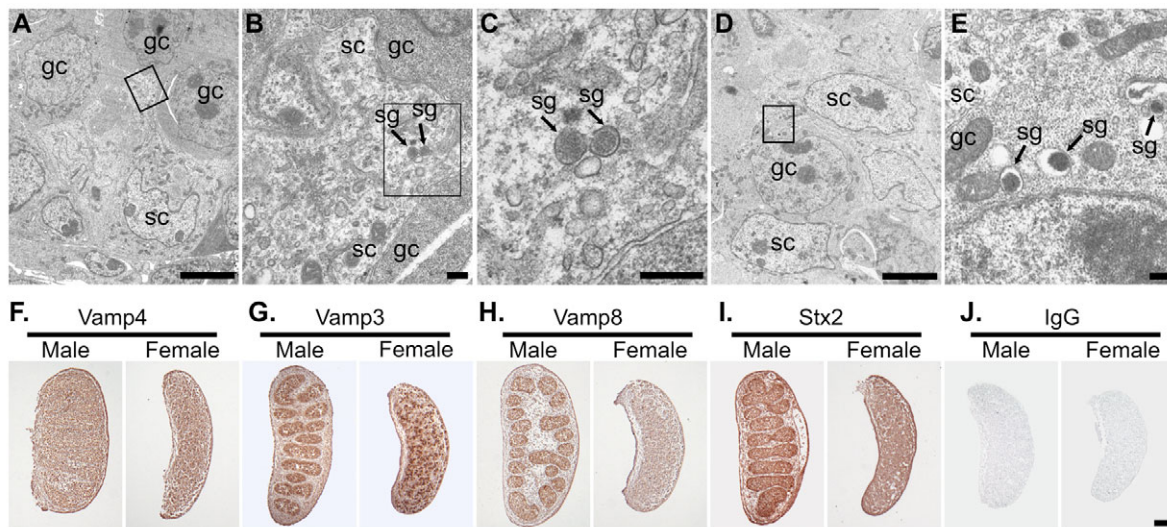

**Fig. 6. Embryonic Sertoli cells are specialised secretory cells.** EM of 13.5 dpc testes showing secretory granules in Sertoli cells and germ cells (A-E). (A,D) Low-magnification image showing arrangement of germ cells (gc) and Sertoli cells (sc). (B,C,E) Higher magnification of boxed regions in A, B and D, respectively. Secretory granules (sg) are indicated. Scale bars: 5  $\mu$ m in A,D; 0.1  $\mu$ m in B,C,E. (F-I) Immunohistochemistry for SNAREs (brown precipitate) in 13.5 dpc ovaries and testes. (F) Vamp4 (trans-Golgi network) is ubiquitously expressed. (G) Vamp3 (secretory granules, endosomes) is abundant in a subset of cells in male and female gonads. (H,I) Vamp8 (secretory granules, endosomes) and Stx2 (apical plasma membrane) are abundant in testis cords. (J) Non-specific IgG controls show no significant staining. Scale bar: 100  $\mu$ m.

by comparing the behaviour of male gonads treated with brefeldin A, exogenous retinoic acid and the Cyp26 inhibitor ketoconazole (Bowles et al., 2006; Koubova et al., 2006). In contrast to the germ cell sex-reversal seen with transient brefeldin A-treatment, continuous culture of 11.5 dpc male urogenital ridges in exogenous retinoic acid did not cause the appearance of significant numbers of meiotic germ cells. Typically, around 1% of the Mvh-positive cells had meiotic Syp3 staining, but the vast majority of the germ cells developed as male (Fig. 7M-O, arrows). Treatment of 11.5 dpc male urogenital ridges with 40  $\mu$ M ketoconazole (Bowles et al., 2006) resulted in widespread cell death and a failure of tissue development (D.B. and I.R.A., unpublished). Treatment of 11.5 dpc male urogenital ridges with 0.7  $\mu$ M ketoconazole (Koubova et al., 2006) resulted in better gonad development, but the majority of the germ cells developed as male (Fig. 7P-R, arrows), and only a small number of germ cells (around 1%) were meiotic. We confirmed that retinoic acid or ketoconazole treatment was sufficient to induce expression of *Stra8* in male gonads, as reported previously (Bowles et al., 2006; Koubova et al., 2006) (see Fig. S5 in the supplementary material). Therefore, although manipulation of retinoic acid levels or Cyp26 activity can induce inappropriate gene expression in male gonads, these treatments do not appear to induce meiosis or change germ cell fate.

## DISCUSSION

### Sdmg1 is involved in membrane trafficking

This study describes the identification and characterisation of a novel transmembrane protein associated with membrane trafficking in Sertoli cells. Knock-down of *Sdmg1* in SK11 Sertoli cells shows that *Sdmg1* is required for correct trafficking of the plasma membrane SNARE Stx2. However, we cannot distinguish whether the intracellular accumulation of Stx2 is a primary consequence of *Sdmg1* knock-down, or if this is a secondary effect of perturbing some other aspect of post-Golgi trafficking or Stx2 expression. Stx2 is localised to the apical plasma membrane in pancreatic acinar cells (Gaisano et al., 1996a), and actively cycles between the plasma

membrane and endosomes in cell culture (Band and Kuismanen, 2005). In *Sdmg1* knock-down cells, the intracellular accumulations of Stx2 could be caused by Stx2 becoming trapped in an endosome compartment, or by Stx2 being mis-sorted when passing through endosomes. As the secretory granule/endosome marker Vamp8 does not accumulate in *Sdmg1* knock-down cells, it is perhaps more likely that Stx2 is being mis-sorted in *Sdmg1* knock-down cells. The impaired ability of *Sdmg1* knock-down cells to influence the development of female germ cells is also consistent with *Sdmg1* being required for normal membrane trafficking in SK11 Sertoli cells. However, further work is required to elucidate the molecular basis of the Stx2 mis-localisation and impaired masculinising ability of the *Sdmg1* knock-down Sertoli cell lines.

The data in this manuscript suggest that *Sdmg1* has an endosomal function, but it is not clear what the biochemical function of *Sdmg1* might be. The transmembrane nature of *Sdmg1* could allow this protein to coordinate sorting of intra-luminal cargo with lipid microdomains or cytosolic membrane trafficking proteins, or to form a channel to transport molecules into, or out of, endosomes to influence the luminal environment. An alternative possibility is that *Sdmg1* could facilitate transport of some proteins through the membrane trafficking system. Many developmental signalling molecules, including Hedgehogs, Wnts and EGF receptor ligands, are modified or require accessory factors during secretion, and secretion of Hedgehog and Wnt signals may involve specialised secretory pathways and/or endosomal intermediates (Coudreuse and Korswagen, 2007; Nusse, 2003; Urban et al., 2001). By analogy, *Sdmg1* may be part of a complex that modifies or interacts with trafficking cargo to facilitate their sorting or secretion. Biochemical characterisation of *Sdmg1* and its interacting partners will be required to test these hypotheses.

### Membrane trafficking in embryonic Sertoli cells

We have shown that membrane trafficking proteins *Sdmg1*, *Vamp8* and *Stx2*, are all upregulated in male embryonic gonads. One of the main functions of the embryonic Sertoli cells is to communicate the



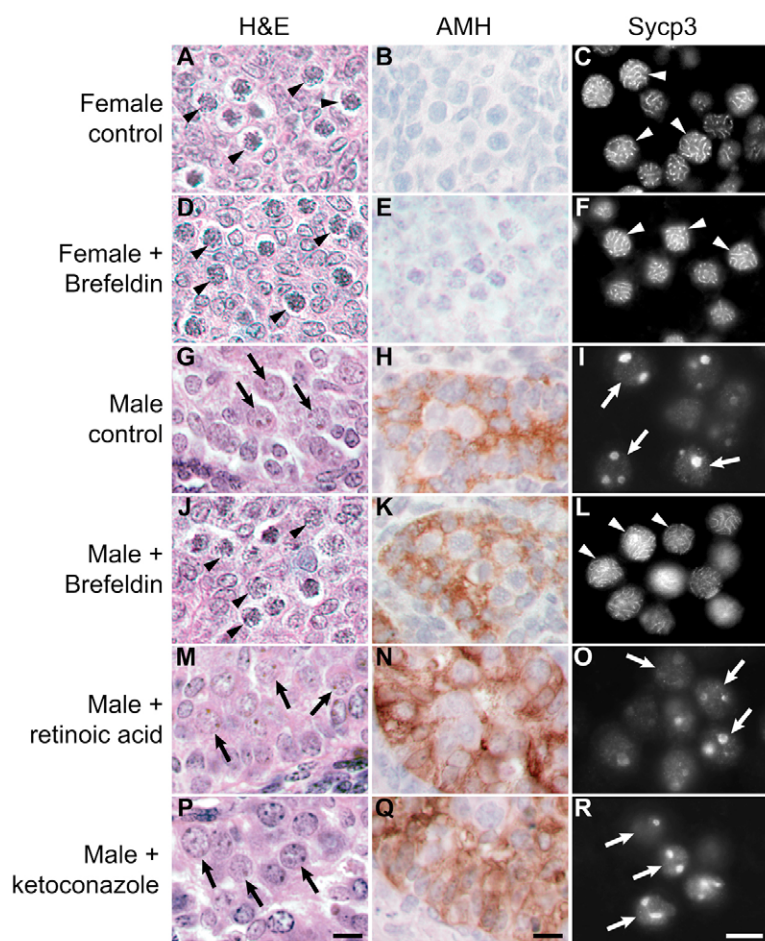

**Fig. 7. Perturbing secretion induces male-to-female germ cell sex reversal in embryonic gonad cultures.** (A-R) Urogenital ridges (11.5 dpc) were transiently treated with or without brefeldin A to block secretion, or were cultured continuously with retinoic acid or ketoconazole. Urogenital ridges were cultured for 4 days and analysed by histology (Haematoxylin and Eosin) to assess germ cell development, and immunostained for anti-Mullerian hormone (AMH, brown precipitate) to assess Sertoli cell development. Urogenital ridges were also cultured for 6 days and immunostained for synaptonemal complex protein 3 (Sycp3). Sycp3 labels the thread-like synaptonemal complex in meiotic oocytes, and is present as large aggregates in prospermatogonia. Examples of meiotic oocytes are labelled with arrowheads; examples of prospermatogonia are labelled with arrows. Scale bars: 10  $\mu$ m.

male sex-determining decision to various sexually dimorphic cell types in the urogenital system, therefore it seems reasonable that Sertoli cells may alter or upregulate their membrane trafficking pathway to facilitate this. Furthermore, nascent Sertoli cells undergo a mesenchymal-to-epithelial transition and cell polarisation during formation of the testis cords. The polarisation of the Sertoli cells, and the resulting need to sort cargo to apical and basolateral destinations, may also underlie some of the changes in the membrane trafficking pathway that we have observed in embryonic Sertoli cells.

The SNAREs Vamp8 and Stx2 are both upregulated in male embryonic gonads. In the adult testis, Stx2 is expressed in the Sertoli cells, but Vamp8 is not (D.B. and I.R.A., unpublished). The expression of Vamp8 in embryonic but not adult Sertoli cells correlates with the transient presence of secretory granules in rat Sertoli cells (Hatier and Grignon, 1980). However, surviving *Vamp8* knockout mice are fertile (Wang et al., 2004), demonstrating that Vamp8 expression is not essential for Sertoli cell function. By contrast, Stx2 knockout mice are male sterile owing to defective spermatogenesis (Wang et al., 2006). Thus, Stx2 may be important for Sertoli cell function in adult mice, but the reported phenotype does not suggest a problem during embryonic gonadogenesis (Wang et al., 2006). The high levels of similarity between different SNARE proteins may allow some compensation for the loss of Vamp8 or Stx2 function in embryonic Sertoli cells. A more-detailed examination of gonad development and Sertoli cell function in single and multiple SNARE knockout mice might prove to be informative.

Microarray analysis has been used to identify differences in gene expression between male and female embryonic gonads on a genome-wide scale, and *Sdmg1* is present in the male-upregulated datasets in these studies (Beverdam and Koopman, 2006; Nef et al., 2005). Other components of the regulated secretion machinery such as Cadps (Rupnik et al., 2000) and Rab3b (Schluter et al., 2002) are also present in the male-upregulated datasets (Nef et al., 2005). During the course of our study, *Sdmg1* mRNA expression was reported in embryonic and adult Sertoli cells, and *Sdmg1* was proposed to have predicted kinase activity (Svingen et al., 2007). We have been unable to identify any sequence similarity between *Sdmg1* and any protein kinase. However, the human C22orf5 DUF300-containing protein was isolated in a screen for cDNAs that activate MAP kinases (Matsuda et al., 2003). Although our study has focussed on *Sdmg1* rather than C22orf5, localisation of activate MAP kinases to signalling endosomes is important for regulating signal transduction cascades (von Zastrow and Sorkin, 2007). Interestingly, the active phosphorylated form of Erk2 localises to peripheral punctate clusters, like *Sdmg1*, in differentiating SK11 Sertoli cells (D.B. and I.R.A., unpublished). Further research is needed to investigate any functional relationship between *Sdmg1* expression and the MAP kinase pathway in Sertoli cells.

### Germ cell sex determination

The molecular mechanisms regulating germline sex determination in mice remain largely uncharacterised. The differences between germ cell behaviour in male and female gonads is a consequence of

germ cells responding to different gonadal environments, but it is not clear which factors are responsible for this. If a female meiosis-inducing substance exists, its expression must be fairly widespread (Chuma and Nakatsuji, 2001; Farini et al., 2005; McLaren and Southee, 1997; Zamboni and Upadhyay, 1983). By contrast, the observation that germ cells can develop as male in the testis interstitium, or adjacent mesonephros, suggests that a diffusible meiosis-preventing substance exists in the embryonic testis (McLaren, 1984; McLaren, 2003). Our finding that perturbing secretion in embryonic testes induces male-to-female germ cell sex reversal provides direct evidence that a meiosis-preventing substance exists in the embryonic testis.

Retinoic acid has recently been proposed to be a meiosis-inducing substance (Bowles et al., 2006; Koubova et al., 2006). The widespread distribution of retinoic acid would fit with germ cells being able to initiate meiosis in a variety of ectopic conditions, but experiments demonstrating that exogenous retinoic acid induces expression of meiotic markers in cultured 12.5 dpc testes (Bowles et al., 2006; Koubova et al., 2006) contradict experiments showing that germ cells isolated from 12.5 dpc testes are unable to initiate meiosis when re-aggregated with female gonadal tissue (Adams and McLaren, 2002). Furthermore, exogenous retinoic acid does not induce meiosis in cultured rat embryonic testes, but does induce cell death and a reduction in Sertoli cell and germ cell number (Li and Kim, 2004). The data presented in this manuscript provides further evidence that retinoic acid is not a meiosis-inducing substance: although exogenous retinoic acid can influence gene expression in embryonic testis cultures, significant numbers of meiotic germ cells are not induced by this treatment. It is noteworthy that some meiotic genes are not particularly robust markers for meiosis when assayed at the level of gene expression (Novak et al., 2006).

The retinoic acid model is largely based on changes in gene expression that are detected when embryonic gonads are cultured with activators or inhibitors of retinoic acid or Cyp26b1 (Bowles et al., 2006; Koubova et al., 2006). However, the published histology of the cultured gonads (Bowles et al., 2006) does not support this model: female gonads cultured with retinoic acid receptor antagonists do not appear to contain prospermatogonia; and male gonads cultured with Cyp26b1 inhibitor do not appear to contain meiotic oocytes, which can usually be distinguished by their characteristic condensed thread-like chromatin, but rather appear to contain pyknotic nuclei, a feature of dying cells characterised by condensation of the nucleus to a small structureless mass. These data can be reconciled in a model where retinoic acid may be directly or indirectly influencing germ cell gene expression, but is not acting as a trigger for germ cell sex determination or the initiation of meiosis. Thus, additional signalling molecules are likely to be important for regulating the differences between germ cell development in male and female gonads.

Our experiments have shown that embryonic Sertoli cells upregulate Sdmg1 and Vamp8, and contain secretory granules around the time of germ cell sex determination. Any or all of these changes to the membrane trafficking pathway may be involved in facilitating secretion of a meiosis-preventing substance, or other signalling molecules, out of the embryonic Sertoli cells. Indeed, differences between membrane-trafficking pathways in male and female embryonic supporting cells could generate sex-specific activities from molecules expressed in supporting cells of both sexes. It will be of interest to identify which molecules traffic through Sdmg1 compartments in embryonic Sertoli cells, and whether these molecules are involved in germ cell sex determination or testis development *in vivo*.

We thank the Lister Institute of Preventive Medicine (I.R.A.), the Medical Research Council (D.B., I.R.A. and A.A.P.) and the Wellcome Trust (D.A.S.) for financial support. I.R.A. is a Lister Research Fellow. A.A.P. is a MRC Career Development Fellow. We thank George Enders (University of Kansas Medical Center, Kansas, USA) for anti-GCNA antibody, Scottie Robinson (CIMR, Cambridge) for help and advice, and Nick Hastie, Howard Cooke and Rupert Ollinger (MRC HGU, Edinburgh) for critical reading of the manuscript.

#### Supplementary material

Supplementary material for this article is available at <http://dev.biologists.org/cgi/content/full/135/8/1415/DC1>

#### References

- Adams, I. R. and McLaren, A. (2002). Sexually dimorphic development of mouse primordial germ cells: switching from oogenesis to spermatogenesis. *Development* **129**, 1155-1164.
- Albrecht, K. and Eicher, E. (2001). Evidence that Sry is expressed in pre-Sertoli cells and Sertoli and granulosa cells have a common precursor. *Dev. Biol.* **240**, 92-107.
- Ang, A. L., Taguchi, T., Francis, S., Folsch, H., Murrells, L. J., Pypaert, M., Warren, G. and Mellman, I. (2004). Recycling endosomes can serve as intermediates during transport from the Golgi to the plasma membrane of MDCK cells. *J. Cell Biol.* **167**, 531-543.
- Arney, K. L., Bao, S., Bannister, A. J., Kouzarides, T. and Surani, M. A. (2002). Histone methylation defines epigenetic asymmetry in the mouse zygote. *Int. J. Dev. Biol.* **46**, 317-320.
- Band, A. M. and Kuismanen, E. (2005). Localization of plasma membrane t-SNAREs syntaxin 2 and 3 in intracellular compartments. *BMC Cell Biol.* **6**, 26.
- Beverdam, A. and Koopman, P. (2006). Expression profiling of purified mouse gonadal somatic cells during the critical time window of sex determination reveals novel candidate genes for human sexual dysgenesis syndromes. *Hum. Mol. Genet.* **15**, 417-431.
- Bonifacino, J. S. and Traub, L. M. (2003). Signals for sorting of transmembrane proteins to endosomes and lysosomes. *Annu. Rev. Biochem.* **72**, 395-447.
- Borner, G. H. H., Harbour, M., Hester, S., Lilley, K. S. and Robinson, M. S. (2006). Comparative proteomics of clathrin-coated vesicles. *J. Cell Biol.* **175**, 571-578.
- Bowles, J., Knight, D., Smith, C., Wilhelm, D., Richman, J., Mamiya, S., Yashiro, K., Chawengsaksophak, K., Wilson, M. J., Rossant, J. et al. (2006). Retinoid signaling determines germ cell fate in mice. *Science* **312**, 596-600.
- Chen, Y. A. and Scheller, R. H. (2001). SNARE-mediated membrane fusion. *Nat. Rev. Mol. Cell Biol.* **2**, 98-106.
- Chuma, S. and Nakatsuji, N. (2001). Autonomous transition into meiosis of mouse fetal germ cells *in vitro* and its inhibition by gp130-mediated signaling. *Dev. Biol.* **229**, 468-479.
- Coudreuse, D. and Korswagen, H. C. (2007). The making of Wnt: new insights into Wnt maturation, sorting and secretion. *Development* **134**, 3-12.
- Di Carlo, A. D., Travia, G. and De Felici, M. (2000). The meiotic specific synaptonemal complex protein SCP3 is expressed by female and male primordial germ cells of the mouse embryo. *Int. J. Dev. Biol.* **44**, 241-244.
- Enders, G. C. and May, J. J. (1994). Developmentally regulated expression of a mouse germ cell nuclear antigen examined from embryonic day 11 to adult in male and female mice. *Dev. Biol.* **163**, 331-340.
- Farini, D., Scaldaferrri, M. L., Iona, S., La Sala, G. and De Felici, M. (2005). Growth factors sustain primordial germ cell survival, proliferation and entering into meiosis in the absence of somatic cells. *Dev. Biol.* **285**, 49-56.
- Gaisano, H. Y., Ghai, M., Malkus, P. N., Sheu, L., Bouquillon, A., Bennett, M. K. and Trimble, W. S. (1996a). Distinct cellular locations of the syntaxin family of proteins in rat pancreatic acinar cells. *Mol. Biol. Cell* **7**, 2019-2027.
- Gaisano, H. Y., Sheu, L., Grondin, G., Ghai, M., Bouquillon, A., Lowe, A., Beaudoin, A. and Trimble, W. S. (1996b). The vesicle-associated membrane protein family of proteins in rat pancreatic and parotid acinar cells. *Gastroenterology* **111**, 1661-1669.
- Hansen, N. J., Antonin, W. and Edwardson, J. M. (1999). Identification of SNAREs involved in regulated exocytosis in the pancreatic acinar cell. *J. Biol. Chem.* **274**, 22871-22876.
- Hatier, R. and Grignon, G. (1980). Ultrastructural study of Sertoli cells in rat seminiferous tubules during intrauterine life and the postnatal period. *Anat. Embryol.* **160**, 11-27.
- Jahn, R. and Scheller, R. H. (2006). SNAREs-engines for membrane fusion. *Nat. Rev. Mol. Cell Biol.* **7**, 631-643.
- Jost, A. (1947). Recherches sur la différenciation sexuelle de l'embryon de lapin. *Arch. Anat. Microsc. Morphol. Exp.* **36**, 271-315.
- Klausner, R. D., Donaldson, J. G. and Lippincott-Schwartz, J. (1992). Brefeldin A: insights into the control of membrane traffic and organelle structure. *J. Cell Biol.* **116**, 1071-1080.
- Koopman, P., Gubbay, J., Vivian, N., Goodfellow, P. and Lovell-Badge, R. (1991). Male development of chromosomally female mice transgenic for Sry. *Nature* **351**, 117-121.

- Koubova, J., Menke, D. B., Zhou, Q., Capel, B., Griswold, M. D. and Page, D. C.** (2006). Retinoic acid regulates sex-specific timing of meiotic initiation in mice. *Proc. Natl. Acad. Sci. USA* **103**, 2474-2479.
- Krogh, A., Larsson, B., von Heijne, G. and Sonnhammer, E. L. L.** (2001). Predicting transmembrane protein topology with a hidden Markov model: application to complete genomes. *J. Mol. Biol.* **305**, 567-580.
- Li, H. and Kim, K. H.** (2004). Retinoic acid inhibits Rat XY gonad development by blocking mesonephric cell migration and decreasing the number of gonocytes. *Biol. Reprod.* **70**, 687-693.
- Lock, J. G. and Stow, J. L.** (2005). Rab11 in recycling endosomes regulates the sorting and basolateral transport of E-Cadherin. *Mol. Biol. Cell* **16**, 1744-1755.
- Lovell-Badge, R. and Robertson, E.** (1990). XY female mice resulting from a heritable mutation in the murine primary testis determining gene, Tdy. *Development* **109**, 635-646.
- Lyon, M. F., Rastan, S. and Brown, S. D. M.** (1996). *Genetic Variants and Strains of the Laboratory Mouse* (3rd edn). Oxford: Oxford University Press.
- Matsuda, A., Suzuki, Y., Honda, G., Muramatsu, S., Matsuzaki, O., Nagano, Y., Doi, T., Shimotohno, K., Harada, T., Nishida, E. et al.** (2003). Large-scale identification and characterization of human genes that activate NF-kappaB and MAPK signaling pathways. *Oncogene* **22**, 3307-3318.
- McLaren, A.** (1984). Meiosis and differentiation of mouse germ cells. In *Controlling Events in Meiosis: 38th Symposium of the Society for Experimental Biology* (ed. C. W. Evans and H. G. Dickinson), pp. 7-23. Cambridge: Company of Biologists.
- McLaren, A.** (2000). Germ and somatic cell lineages in the developing gonad. *Mol. Cell. Endocrinol.* **163**, 3-9.
- McLaren, A.** (2003). Primordial germ cells in the mouse. *Dev. Biol.* **262**, 1-15.
- McLaren, A. and Southee, D.** (1997). Entry of mouse embryonic germ cells into meiosis. *Dev. Biol.* **187**, 107-113.
- Meehan, T., Schlatt, S., O'Bryan, M. K., de Kretser, D. M. and Loveland, K. L.** (2000). Regulation of germ cell and Sertoli cell development by activin, follistatin and FSH. *Dev. Biol.* **220**, 225-237.
- Nef, S., Schaad, O., Stallings, N. R., Cederroth, C. R., Pitetti, J. L., Schaer, G., Malki, S., Dubois-Dauphin, M., Boizet-Bonhoure, B., Descombes, P. et al.** (2005). Gene expression during sex determination reveals a robust female genetic program at the onset of ovarian development. *Dev. Biol.* **287**, 361-377.
- Novak, I., Lightfoot, D. A., Wang, H., Eriksson, A., Mahdy, E. and Hoog, C.** (2006). Mouse embryonic stem cells form follicle-like ovarian structures but do not progress through meiosis. *Stem Cells* **24**, 1931-1936.
- Nusse, R.** (2003). Wnts and Hedgehogs: lipid-modified proteins and similarities in signaling mechanisms at the cell surface. *Development* **130**, 5297-5305.
- Ogawa, H., Mori, T. and Shimizu, H.** (1997). Effect of Brefeldin-A on the development of mouse 4-cell embryos in vitro. *J. Reprod. Dev.* **43**, 151-156.
- Palmer, S. J. and Burgoyne, P. S.** (1991). *In situ* analysis of fetal, prepubertal and adult XX+XY chimaeric mouse testes: Sertoli cells are predominantly, but not exclusively, XY. *Development* **112**, 265-268.
- Perret, E., Lakkaraju, A., Deborde, S., Schreiner, R. and Rodriguez-Boulan, E.** (2005). Evolving endosomes: how many varieties and why? *Curr. Opin. Cell Biol.* **17**, 423-434.
- Prekeris, R., Yang, B., Oorschot, V., Klumperman, J. and Scheller, R. H.** (1999). Differential roles of syntaxin 7 and syntaxin 8 in endosomal trafficking. *Mol. Biol. Cell* **10**, 3891-3908.
- Ross, A. J. and Capel, B.** (2005). Signaling at the crossroads of gonad development. *Trends Endocrinol. Metab.* **16**, 19-25.
- Rupnik, M., Kreft, M., Sikdar, S. K., Grilc, S., Romih, R., Zupancic, G., Martin, T. F. J. and Zorec, R.** (2000). Rapid regulated dense-core vesicle exocytosis requires the CAPS protein. *Proc. Natl. Acad. Sci. USA* **97**, 5627-5632.
- Sachse, M., Urbe, S., Oorschot, V., Strous, G. J. and Klumperman, J.** (2002). Bilayered clathrin coats on endosomal vacuoles are involved in protein sorting toward lysosomes. *Mol. Biol. Cell* **13**, 1313-1328.
- Sambrook, J. and Russell, D. W.** (2001). *Molecular Cloning: A Laboratory Manual*. New York: Cold Spring Harbor Laboratory Press.
- Schluter, O. M., Khvotchev, M., Jahn, R. and Sudhof, T. C.** (2002). Localization versus function of Rab3 proteins. Evidence for a common regulatory role in controlling fusion. *J. Biol. Chem.* **277**, 40919-40929.
- Slot, J. W. and Geuze, H. J.** (1983). The use of protein A-colloidal gold (PAG) complexes as immunolabels in ultrathin frozen sections. In *Immunohistochemistry* (ed. A. C. Cuellar), pp. 323-346. Chichester: John Wiley & Sons.
- Steegmaier, M., Klumperman, J., Foletti, D. L., Yoo, J. S. and Scheller, R. H.** (1999). Vesicle-associated membrane protein 4 is implicated in trans-golgi network vesicle trafficking. *Mol. Biol. Cell* **10**, 1957-1972.
- Steegmaier, M., Lee, K. C., Prekeris, R. and Scheller, R. H.** (2000). SNARE protein trafficking in polarized MDCK cells. *Traffic* **1**, 553-560.
- Svingen, T., Beverdam, A., Bernard, P., McClive, P., Harley, V. R., Sinclair, A. H. and Koopman, P.** (2007). Sex-specific expression of a novel gene Tmem184a during mouse testis differentiation. *Reproduction* **133**, 983-989.
- Urban, S., Lee, J. R. and Freeman, M.** (2001). Drosophila Rhomboid-1 defines a family of putative intramembrane serine proteases. *Cell* **107**, 173-182.
- von Zastrow, M. and Sorkin, A.** (2007). Signaling on the endocytic pathway. *Curr. Opin. Cell Biol.* **19**, 436-445.
- Walther, N., Jansen, M., Ergun, S., Kascheike, B. and Ivell, R.** (1996). Sertoli cell lines established from H-2Kb-tsA58 transgenic mice differentially regulate the expression of cell-specific genes. *Exp. Cell Res.* **225**, 411-421.
- Wang, C. C., Ng, C. P., Lu, L., Atlashkin, V., Zhang, W., Seet, L. F. and Hong, W.** (2004). A role of VAMP8/Endobrevin in regulated exocytosis of pancreatic acinar cells. *Dev. Cell* **7**, 359-371.
- Wang, Y., Wang, L., Iordanov, H., Swietlicki, E. A., Zheng, Q., Jiang, S., Tang, Y., Levin, M. S. and Rubin, D. C.** (2006). Epimorphin-/- mice have increased intestinal growth, decreased susceptibility to dextran sodium sulfate colitis, and impaired spermatogenesis. *J. Clin. Invest.* **116**, 1535-1546.
- Wilhelm, D., Martinson, F., Bradford, S., Wilson, M. J., Combes, A. N., Beverdam, A., Bowles, J., Mizusaki, H. and Koopman, P.** (2005). Sertoli cell differentiation is induced both cell-autonomously and through prostaglandin signaling during mammalian sex determination. *Dev. Biol.* **287**, 111-124.
- Zamboni, L. and Upadhyay, S.** (1983). Germ cell differentiation in mouse adrenal glands. *J. Exp. Zool.* **228**, 173-193.
- Zheng, B., Mills, A. A. and Bradley, A.** (1999). A system for rapid generation of coat color-tagged knockouts and defined chromosomal rearrangements in mice. *Nucleic Acids Res.* **27**, 2354-2360.
